# Supplementary material for: Magnetic properties of transition metal dimers probed by inelastic neutron scattering
Source: Royal Society of Chemistry journal article supplement (doi:10.1039/c8dt02570c), 2018-01-01
Supplement: c8dt02570c1.pdf [file c8dt02570c1.pdf]

## Supporting Information

# Magnetic properties of Transition Metal Dimers Probed by Inelastic Neutron Scattering

Simon Ansbro<sup>\*a,b</sup>, Eufemio Moreno-Pineda<sup>\*c</sup>, Wen Yu<sup>c,d</sup>, Jacques Ollivier<sup>b</sup>, Hannu Mutka<sup>b</sup>, Mario Ruben<sup>c,e</sup> and Alessandro Chiesa<sup>\*f,g</sup>

<sup>a</sup> School of Chemistry, The University of Manchester, Oxford Road, Manchester, M13 9PL, UK,

<sup>b</sup> Institut Laue-Langevin, 71 Avenue des Martyrs Grenoble CS 20156

<sup>c</sup> Institute of Nanotechnology (INT), Karlsruhe Institute of technology (KIT), Hermann-von-Helmholtz-Platz 1, D-76344 Eggenstein-Leopoldshafen, Germany

<sup>d</sup> Zhejiang Provincial Key Laboratory for Chemical & Biochemical Processing Technology of Farm Products, School of Biological and Chemical Engineering, Zhejiang University of Science and Technology, No. 318 Liuhe Road, Hangzhou 310023 China.

<sup>e</sup> Institut de Physique et Chimie des Matériaux de Strasbourg (IPCMS), CNRS-Université de Strasbourg, 23 rue du Loess, BP 43, F-67034 Strasbourg Cedex 2, France

<sup>f</sup> Dipartimento di Scienze Matematiche, Fisiche e Informatiche, University of Parma, 43124 Parma, Italy

<sup>g</sup> Institute for Advanced Simulation, Forschungszentrum Jülich, Germany

### Experimental Details

Solvents and reagents were of commercial grade and used without further purification. The synthesis was performed by modifying previously published procedures. Elemental analysis data were collected on an ELEMENTAR Vario Micro Cube.

### Preparation of compound $\text{Co}_2$ and $\text{Ni}_2$

A solution of 0.5 mmol 2,2'-bipyrimidine (bpm) in 10 ml of a 1:1 mixture of ethanol/water was dropped to a solution of 1 mmol  $\text{M}(\text{hfacac})_2$  ( $\text{M}=\text{Co}^{2+}$ ,  $\text{Ni}^{2+}$ ) in 15 mL of a (3:1) mixture of ethanol/water. The mixture was stirred for several hours at room temperature, after which precipitates were formed. The residual solvent was filtered and kept at  $-17\text{ }^\circ\text{C}$  to obtain crystals. The solid was washed twice with a mixture of ethanol/water (1:1). The solid was dried at  $90\text{ }^\circ\text{C}$  and X-ray diffraction quality crystals were formed by recrystallization from  $\text{Et}_2\text{O}$ .  $[(\text{Ni}(\text{hfacac})_2)_2(\text{bpm})]$  ( $\text{Ni}_2$ ): pale green crystals; yield 41%; elemental analysis calculated (%) for  $\text{C}_{28}\text{H}_{14}\text{F}_{24}\text{N}_4\text{O}_8\text{Ni}_2$ : C 30.36, H 1.27, N 5.06; found: C 30.52, H 1.18, N 5.15;  $[(\text{Co}(\text{hfacac})_2)_2(\text{bpm})]$  ( $\text{Co}_2$ ): red crystals; yield 57%; elemental

analysis calculated (%) for  $C_{28}H_{14}F_{24}N_4O_8Co_2$ : C 30.34, H 1.27, N 5.06; found: C 30.54, H 1.16, N 5.10.

**Table S1.** Continuous shaped measures (CShM) for compound  $Co_2$  and  $Ni_2$ .

|        | Co(1)  | Co(2)  | Ni(1)  | Ni(2)  |
|--------|--------|--------|--------|--------|
| HP-6   | 31.647 | 31.337 | 31.926 | 31.357 |
| PPY-6  | 27.333 | 27.331 | 27.982 | 27.922 |
| OC-6   | 0.402  | 0.508  | 0.247  | 0.326  |
| TPR 6  | 14.290 | 14.716 | 14.979 | 14.959 |
| JPPY-6 | 31.076 | 31.031 | 31.661 | 31.494 |

HP-6 = ( $D_{6h}$ ) Hexagon

PPY-6 = ( $C_{5v}$ ) Pentagonal pyramid

OC-6 = ( $Oh$ ) Octahedron

TPR-6 = ( $D_{3h}$ ) Trigonal prism

JPPY-6 = ( $C_{5v}$ ) Johnson pentagonal pyramid J2

### Inelastic Neutron Scattering spectrum of $Ni_2$

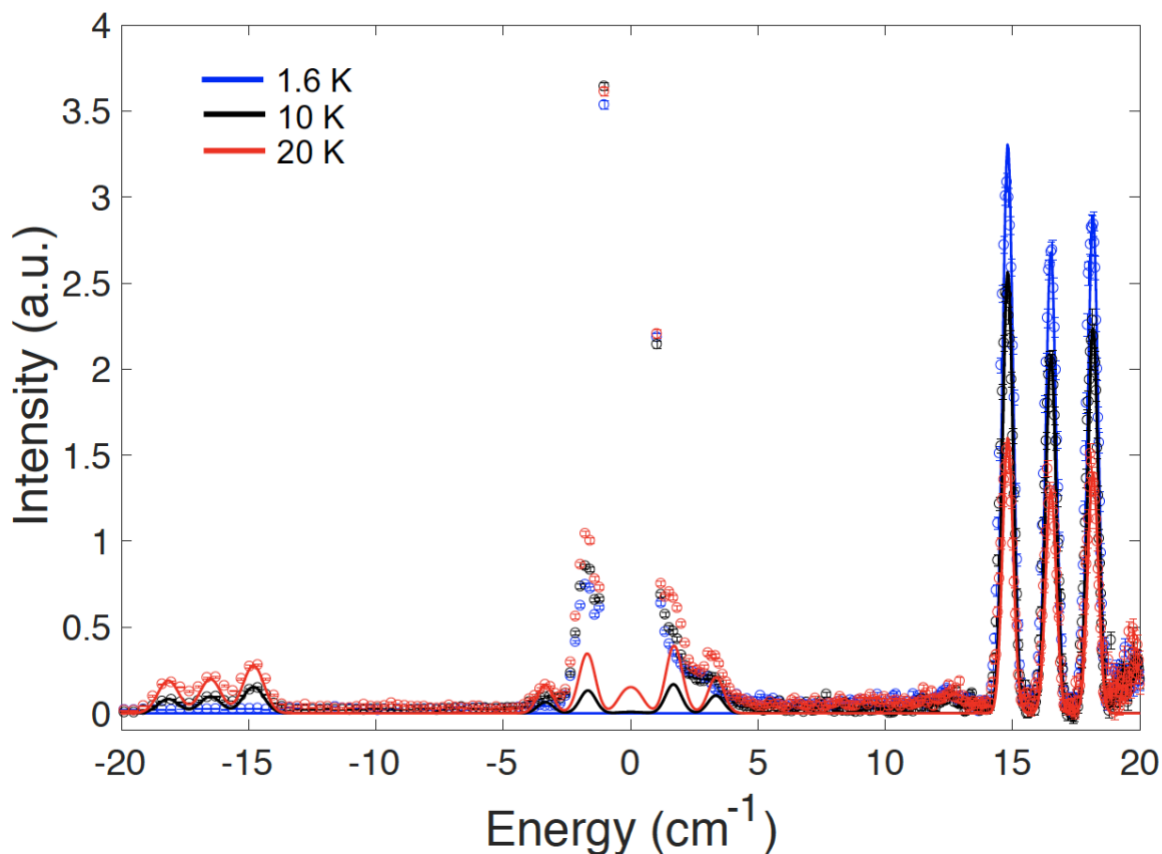

**Figure S1:** Measured (symbols) and calculated (continuous lines) energy spectrum of  $Ni_2$  at 1.6, 10 and 20 K both on the energy gain and energy loss sides.

## Inelastic Neutron Scattering data of Co<sub>2</sub>

**Table S2.** Energy spectrum (a.u.) of Co<sub>2</sub> collected at 1.6 K with incident neutron wavelength 4.8 Å.

| E (cm <sup>-1</sup> ) | I (a.u.) | err (a.u.) |
|-----------------------|----------|------------|
| -16.4038              | -0.4819  | 0.0027     |
| -16.0649              | -0.4562  | 0.0028     |
| -15.7299              | -0.4399  | 0.0027     |
| -15.3986              | -0.4171  | 0.0028     |
| -15.0709              | -0.3937  | 0.0029     |
| -14.7470              | -0.3743  | 0.0029     |
| -14.4266              | -0.3575  | 0.0029     |
| -14.1098              | -0.3347  | 0.0030     |
| -13.7965              | -0.3164  | 0.0030     |
| -13.4865              | -0.2994  | 0.0031     |
| -13.1800              | -0.2809  | 0.0031     |
| -12.8768              | -0.2691  | 0.0031     |
| -12.5768              | -0.2497  | 0.0032     |
| -12.2802              | -0.2360  | 0.0032     |
| -11.9867              | -0.2153  | 0.0033     |
| -11.6963              | -0.2003  | 0.0034     |
| -11.4091              | -0.1881  | 0.0034     |
| -11.1249              | -0.1765  | 0.0034     |
| -10.8438              | -0.1655  | 0.0034     |
| -10.5656              | -0.1478  | 0.0035     |
| -10.2903              | -0.1369  | 0.0035     |
| -10.0179              | -0.1225  | 0.0036     |
| -9.7484               | -0.1122  | 0.0037     |
| -9.4817               | -0.1049  | 0.0036     |
| -9.2177               | -0.0933  | 0.0037     |
| -8.9566               | -0.0797  | 0.0038     |
| -8.6980               | -0.0720  | 0.0038     |
| -8.4421               | -0.0643  | 0.0038     |
| -8.1889               | -0.0569  | 0.0038     |
| -7.9382               | -0.0431  | 0.0039     |
| -7.6901               | -0.0283  | 0.0041     |
| -7.4445               | -0.0233  | 0.0041     |
| -7.2014               | -0.0174  | 0.0041     |
| -6.9608               | -0.0092  | 0.0042     |
| -6.7225               | 0.0044   | 0.0043     |
| -6.4867               | 0.0095   | 0.0043     |
| -6.2532               | 0.0183   | 0.0044     |
| -6.0220               | 0.0187   | 0.0043     |
| -5.7931               | 0.0220   | 0.0043     |
| -5.5664               | 0.0334   | 0.0045     |

|         |          |        |
|---------|----------|--------|
| -5.3420 | 0.0473   | 0.0047 |
| -5.1198 | 0.0473   | 0.0046 |
| -4.8998 | 0.0521   | 0.0047 |
| -4.6819 | 0.0579   | 0.0047 |
| -4.4661 | 0.0681   | 0.0049 |
| -4.2525 | 0.0729   | 0.0049 |
| -4.0408 | 0.0740   | 0.0049 |
| -3.8312 | 0.0838   | 0.0051 |
| -3.6237 | 0.0914   | 0.0052 |
| -3.4181 | 0.0973   | 0.0053 |
| -3.2144 | 0.1070   | 0.0055 |
| -3.0127 | 0.1095   | 0.0055 |
| -2.8130 | 0.1254   | 0.0058 |
| -2.6151 | 0.1295   | 0.0059 |
| -2.4190 | 0.1389   | 0.0060 |
| -2.2248 | 0.1593   | 0.0064 |
| -2.0324 | 0.1714   | 0.0066 |
| -1.8418 | 0.1855   | 0.0069 |
| -1.6530 | 0.2013   | 0.0072 |
| -1.4659 | 0.2218   | 0.0075 |
| -1.2806 | 0.2937   | 0.0085 |
| -1.0970 | 1.2631   | 0.0162 |
| -0.9150 | 11.5517  | 0.0506 |
| -0.7347 | 65.6643  | 0.1247 |
| -0.5561 | 219.5674 | 0.2324 |
| -0.3791 | 485.7857 | 0.3501 |
| -0.2037 | 775.6459 | 0.4464 |
| -0.0298 | 936.4140 | 0.4940 |
| 0.1424  | 869.7190 | 0.4788 |
| 0.3131  | 616.7688 | 0.4047 |
| 0.4823  | 321.7985 | 0.2927 |
| 0.6500  | 114.7852 | 0.1741 |
| 0.8162  | 25.3017  | 0.0806 |
| 0.9809  | 3.6178   | 0.0303 |
| 1.1441  | 0.8894   | 0.0158 |
| 1.3059  | 0.6509   | 0.0139 |
| 1.4663  | 0.5969   | 0.0134 |
| 1.6253  | 0.5193   | 0.0126 |
| 1.7829  | 0.4741   | 0.0121 |
| 1.9391  | 0.4501   | 0.0119 |
| 2.0939  | 0.4219   | 0.0116 |
| 2.2474  | 0.4015   | 0.0115 |
| 2.3996  | 0.4148   | 0.0117 |
| 2.5505  | 0.4157   | 0.0118 |
| 2.7000  | 0.4006   | 0.0117 |
| 2.8483  | 0.3711   | 0.0114 |

|        |        |        |
|--------|--------|--------|
| 2.9953 | 0.3527 | 0.0112 |
| 3.1411 | 0.3396 | 0.0111 |
| 3.2856 | 0.3112 | 0.0108 |
| 3.4289 | 0.2986 | 0.0107 |
| 3.5710 | 0.2873 | 0.0106 |
| 3.7119 | 0.2689 | 0.0104 |
| 3.8516 | 0.2513 | 0.0102 |
| 3.9901 | 0.2631 | 0.0105 |
| 4.1275 | 0.2418 | 0.0102 |
| 4.2637 | 0.2441 | 0.0103 |
| 4.3988 | 0.2507 | 0.0105 |
| 4.5328 | 0.2545 | 0.0107 |
| 4.6656 | 0.2438 | 0.0106 |
| 4.7974 | 0.2590 | 0.0110 |
| 4.9281 | 0.2641 | 0.0112 |
| 5.0577 | 0.2566 | 0.0112 |
| 5.1863 | 0.2701 | 0.0115 |
| 5.3138 | 0.2822 | 0.0118 |
| 5.4403 | 0.2782 | 0.0119 |
| 5.5657 | 0.2594 | 0.0116 |
| 5.6901 | 0.2554 | 0.0117 |
| 5.8136 | 0.2628 | 0.0119 |
| 5.9360 | 0.2741 | 0.0122 |
| 6.0575 | 0.3037 | 0.0129 |
| 6.1779 | 0.3277 | 0.0134 |
| 6.2974 | 0.4178 | 0.0148 |
| 6.4160 | 0.5988 | 0.0174 |
| 6.5336 | 0.8898 | 0.0209 |
| 6.6503 | 1.2904 | 0.0249 |
| 6.7661 | 1.7887 | 0.0292 |
| 6.8810 | 2.4168 | 0.0339 |
| 6.9949 | 3.0386 | 0.0381 |
| 7.1080 | 3.6905 | 0.0421 |
| 7.2202 | 4.1339 | 0.0447 |
| 7.3315 | 4.3629 | 0.0462 |
| 7.4419 | 4.2998 | 0.0461 |
| 7.5515 | 4.0259 | 0.0449 |
| 7.6602 | 3.6123 | 0.0429 |
| 7.7681 | 3.1489 | 0.0403 |
| 7.8752 | 2.6283 | 0.0372 |
| 7.9814 | 2.1665 | 0.0342 |
| 8.0869 | 1.7872 | 0.0314 |
| 8.1915 | 1.4701 | 0.0289 |
| 8.2953 | 1.1683 | 0.0262 |
| 8.3984 | 0.9341 | 0.0240 |
| 8.5006 | 0.7827 | 0.0224 |

|         |        |        |
|---------|--------|--------|
| 8.6021  | 0.7085 | 0.0216 |
| 8.7028  | 0.6388 | 0.0209 |
| 8.8028  | 0.5592 | 0.0200 |
| 8.9020  | 0.5083 | 0.0194 |
| 9.0005  | 0.4397 | 0.0186 |
| 9.0983  | 0.3938 | 0.0180 |
| 9.1952  | 0.3444 | 0.0174 |
| 9.2915  | 0.2965 | 0.0167 |
| 9.3871  | 0.2808 | 0.0166 |
| 9.4820  | 0.2726 | 0.0166 |
| 9.5762  | 0.2778 | 0.0168 |
| 9.6696  | 0.2658 | 0.0167 |
| 9.7624  | 0.2950 | 0.0174 |
| 9.8545  | 0.3289 | 0.0181 |
| 9.9460  | 0.3730 | 0.0190 |
| 10.0367 | 0.4661 | 0.0206 |
| 10.1268 | 0.6049 | 0.0228 |
| 10.2163 | 0.7477 | 0.0249 |
| 10.3051 | 0.7790 | 0.0254 |
| 10.3933 | 0.7766 | 0.0256 |
| 10.4808 | 0.8241 | 0.0263 |
| 10.5678 | 0.7694 | 0.0258 |
| 10.6540 | 0.6561 | 0.0245 |
| 10.7397 | 0.5604 | 0.0233 |
| 10.8247 | 0.4794 | 0.0223 |
| 10.9092 | 0.3908 | 0.0210 |
| 10.9931 | 0.3337 | 0.0202 |
| 11.0763 | 0.3092 | 0.0200 |
| 11.1590 | 0.3180 | 0.0203 |
| 11.2411 | 0.3631 | 0.0212 |
| 11.3226 | 0.3602 | 0.0213 |
| 11.4035 | 0.3998 | 0.0222 |
| 11.4839 | 0.4556 | 0.0232 |
| 11.5637 | 0.5240 | 0.0245 |
| 11.6430 | 0.6901 | 0.0270 |
| 11.7217 | 0.8491 | 0.0293 |
| 11.7999 | 1.0196 | 0.0317 |
| 11.8775 | 1.2310 | 0.0343 |
| 11.9546 | 1.3616 | 0.0360 |
| 12.0311 | 1.4403 | 0.0370 |
| 12.1072 | 1.5031 | 0.0379 |
| 12.1827 | 1.5202 | 0.0383 |
| 12.2577 | 1.4248 | 0.0375 |
| 12.3321 | 1.3322 | 0.0367 |
| 12.4061 | 1.2363 | 0.0358 |
| 12.4796 | 1.1934 | 0.0355 |

|         |        |        |
|---------|--------|--------|
| 12.5526 | 1.1656 | 0.0354 |
| 12.6251 | 1.2257 | 0.0363 |
| 12.6970 | 1.2506 | 0.0368 |
| 12.7686 | 1.3387 | 0.0380 |
| 12.8395 | 1.4603 | 0.0396 |
| 12.9101 | 1.5804 | 0.0411 |
| 12.9802 | 1.6819 | 0.0424 |
| 13.0498 | 1.7945 | 0.0438 |
| 13.1189 | 1.8975 | 0.0451 |
| 13.1877 | 1.9032 | 0.0454 |
| 13.2559 | 1.8680 | 0.0453 |
| 13.3236 | 1.8003 | 0.0448 |
| 13.3910 | 1.7897 | 0.0450 |
| 13.4579 | 1.6823 | 0.0440 |
| 13.5244 | 1.6344 | 0.0438 |
| 13.5904 | 1.4453 | 0.0419 |
| 13.6560 | 1.3085 | 0.0405 |
| 13.7211 | 1.2060 | 0.0395 |
| 13.7859 | 1.1007 | 0.0383 |
| 13.8502 | 1.0055 | 0.0373 |
| 13.9141 | 0.9116 | 0.0363 |
| 13.9776 | 0.8783 | 0.0360 |
| 14.0406 | 0.7966 | 0.0350 |
| 14.1033 | 0.7444 | 0.0344 |
| 14.1655 | 0.7082 | 0.0341 |
| 14.2275 | 0.6964 | 0.0341 |
| 14.2890 | 0.7010 | 0.0344 |
| 14.3500 | 0.6937 | 0.0345 |
| 14.4107 | 0.6218 | 0.0336 |
| 14.4710 | 0.6150 | 0.0336 |
| 14.5309 | 0.6887 | 0.0350 |
| 14.5904 | 0.7127 | 0.0356 |
| 14.6497 | 0.8058 | 0.0372 |
| 14.7084 | 0.8920 | 0.0387 |
| 14.7668 | 0.9429 | 0.0397 |
| 14.8249 | 0.9865 | 0.0405 |
| 14.8826 | 1.0472 | 0.0416 |
| 14.9399 | 1.0230 | 0.0414 |
| 14.9969 | 1.0061 | 0.0414 |
| 15.0535 | 1.0194 | 0.0419 |
| 15.1098 | 1.0643 | 0.0427 |
| 15.1657 | 1.0779 | 0.0431 |
| 15.2213 | 1.0734 | 0.0433 |
| 15.2765 | 1.0147 | 0.0427 |
| 15.3314 | 1.0756 | 0.0438 |
| 15.3860 | 1.1458 | 0.0449 |

|         |        |        |
|---------|--------|--------|
| 15.4402 | 1.0659 | 0.0441 |
| 15.4940 | 1.1157 | 0.0450 |
| 15.5476 | 1.0495 | 0.0443 |
| 15.6008 | 0.9888 | 0.0436 |
| 15.6537 | 0.9587 | 0.0434 |
| 15.7063 | 0.8346 | 0.0418 |
| 15.7586 | 0.7560 | 0.0407 |
| 15.8105 | 0.7151 | 0.0403 |
| 15.8622 | 0.5945 | 0.0385 |
| 15.9135 | 0.5747 | 0.0384 |
| 15.9645 | 0.5317 | 0.0378 |
| 16.0153 | 0.4840 | 0.0371 |
| 16.0657 | 0.4787 | 0.0372 |
| 16.1158 | 0.5119 | 0.0381 |
| 16.1655 | 0.5294 | 0.0386 |
| 16.2150 | 0.5757 | 0.0396 |
| 16.2642 | 0.5420 | 0.0392 |
| 16.3132 | 0.5952 | 0.0404 |
| 16.3618 | 0.5758 | 0.0403 |
| 16.4102 | 0.5996 | 0.0409 |
| 16.4582 | 0.6359 | 0.0418 |
| 16.5060 | 0.6024 | 0.0414 |
| 16.5535 | 0.5757 | 0.0411 |
| 16.6007 | 0.5618 | 0.0411 |
| 16.6477 | 0.5593 | 0.0413 |
| 16.6943 | 0.5488 | 0.0413 |
| 16.7408 | 0.4834 | 0.0403 |
| 16.7868 | 0.4963 | 0.0407 |
| 16.8327 | 0.5246 | 0.0415 |
| 16.8783 | 0.4664 | 0.0406 |
| 16.9236 | 0.4330 | 0.0402 |
| 16.9687 | 0.4077 | 0.0399 |
| 17.0135 | 0.3981 | 0.0399 |
| 17.0581 | 0.4239 | 0.0406 |
| 17.1023 | 0.4182 | 0.0407 |
| 17.1464 | 0.5323 | 0.0432 |
| 17.1902 | 0.4936 | 0.0427 |
| 17.2337 | 0.3918 | 0.0409 |
| 17.2771 | 0.4996 | 0.0433 |
| 17.3200 | 0.5431 | 0.0443 |
| 17.3629 | 0.4954 | 0.0436 |
| 17.4055 | 0.5127 | 0.0442 |
| 17.4477 | 0.4519 | 0.0432 |
| 17.4898 | 0.4696 | 0.0437 |
| 17.5317 | 0.4994 | 0.0446 |
| 17.5733 | 0.5276 | 0.0454 |



|         |        |        |
|---------|--------|--------|
| 17.6147 | 0.4685 | 0.0444 |
| 17.6558 | 0.5289 | 0.0459 |
| 17.6967 | 0.5643 | 0.0468 |
| 17.7374 | 0.5981 | 0.0477 |
| 17.7779 | 0.5649 | 0.0473 |
| 17.8181 | 0.5648 | 0.0475 |
| 17.8581 | 0.5649 | 0.0477 |
| 17.8979 | 0.5526 | 0.0477 |
| 17.9375 | 0.5430 | 0.0477 |
| 17.9768 | 0.6452 | 0.0500 |
| 18.0160 | 0.6077 | 0.0495 |
| 18.0548 | 0.5971 | 0.0495 |
| 18.0935 | 0.6374 | 0.0506 |
| 18.1320 | 0.5962 | 0.0500 |
| 18.1703 | 0.5649 | 0.0496 |
| 18.2084 | 0.5705 | 0.0499 |
| 18.2463 | 0.6036 | 0.0508 |
| 18.2840 | 0.5731 | 0.0505 |
| 18.3214 | 0.6032 | 0.0513 |
| 18.3587 | 0.6041 | 0.0516 |
| 18.3957 | 0.5844 | 0.0514 |
| 18.4325 | 0.5855 | 0.0516 |
| 18.4692 | 0.5765 | 0.0518 |
| 18.5057 | 0.5992 | 0.0525 |
| 18.5419 | 0.5869 | 0.0524 |
| 18.5780 | 0.6087 | 0.0531 |
| 18.6139 | 0.5665 | 0.0525 |
| 18.6496 | 0.6654 | 0.0548 |
| 18.6851 | 0.7286 | 0.0563 |
| 18.7203 | 0.6582 | 0.0551 |
| 18.7555 | 0.6372 | 0.0549 |
| 18.7904 | 0.6788 | 0.0561 |
| 18.8252 | 0.7660 | 0.0580 |
| 18.8597 | 0.6474 | 0.0559 |
| 18.8941 | 0.6816 | 0.0568 |
| 18.9283 | 0.7240 | 0.0580 |
| 18.9623 | 0.7960 | 0.0596 |
| 18.9961 | 0.8773 | 0.0615 |
| 19.0298 | 0.8943 | 0.0621 |
| 19.0633 | 0.8821 | 0.0621 |
| 19.0966 | 0.8894 | 0.0625 |
| 19.1297 | 0.9193 | 0.0634 |
| 19.1627 | 1.0104 | 0.0654 |
| 19.1955 | 0.9622 | 0.0647 |
| 19.2281 | 0.9207 | 0.0642 |
| 19.2606 | 0.9376 | 0.0648 |

|         |         |        |
|---------|---------|--------|
| 19.2928 | 0.9299  | 0.0649 |
| 19.3250 | 0.8884  | 0.0643 |
| 19.3570 | 0.9201  | 0.0652 |
| 19.3887 | 0.8860  | 0.0648 |
| 19.4204 | 0.9409  | 0.0662 |
| 19.4518 | 0.9335  | 0.0663 |
| 19.4832 | 0.9279  | 0.0665 |
| 19.5143 | 0.8913  | 0.0660 |
| 19.5453 | 0.9693  | 0.0678 |
| 19.5761 | 0.9122  | 0.0670 |
| 19.6067 | 0.9531  | 0.0681 |
| 19.6373 | 0.9879  | 0.0690 |
| 19.6676 | 0.9399  | 0.0684 |
| 19.6979 | 1.0170  | 0.0702 |
| 19.7279 | 1.0510  | 0.0711 |
| 19.7578 | 1.0805  | 0.0719 |
| 19.7876 | 1.0565  | 0.0718 |
| 19.8172 | 1.0967  | 0.0729 |
| 19.8467 | 1.1094  | 0.0734 |
| 19.8760 | 1.0087  | 0.0717 |
| 19.9051 | 1.0443  | 0.0727 |
| 19.9341 | 1.0376  | 0.0729 |
| 19.9630 | 0.8977  | 0.0703 |
| 19.9917 | 0.9981  | 0.0727 |
| 20.0204 | 0.8262  | 0.0693 |
| 20.0488 | 0.7251  | 0.0674 |
| 20.0771 | 0.6231  | 0.0654 |
| 20.1053 | 0.4427  | 0.0612 |
| 20.1333 | 0.3908  | 0.0603 |
| 20.1612 | 0.2050  | 0.0556 |
| 20.1889 | 0.1128  | 0.0532 |
| 20.2166 | -0.0918 | 0.0472 |
| 20.2440 | -0.4939 | 0.0330 |

**Table S3.** Energy spectrum (a.u.) of Co<sub>2</sub> collected at 10 K with incident neutron wavelength 4.8 Å.

| E (cm <sup>-1</sup> ) | I (a.u.) | err (a.u.) |
|-----------------------|----------|------------|
| -20.3352              | 0.0305   | 0.0024     |
| -19.9512              | 0.0300   | 0.0024     |
| -19.5715              | 0.0314   | 0.0024     |
| -19.1964              | 0.0352   | 0.0025     |
| -18.8255              | 0.0387   | 0.0026     |
| -18.4590              | 0.0365   | 0.0026     |
| -18.0968              | 0.0363   | 0.0026     |
| -17.7386              | 0.0404   | 0.0027     |

|          |        |        |
|----------|--------|--------|
| -17.3846 | 0.0429 | 0.0028 |
| -17.0346 | 0.0375 | 0.0027 |
| -16.6886 | 0.0411 | 0.0028 |
| -16.3465 | 0.0435 | 0.0029 |
| -16.0082 | 0.0504 | 0.0030 |
| -15.6738 | 0.0645 | 0.0033 |
| -15.3431 | 0.0752 | 0.0034 |
| -15.0162 | 0.0820 | 0.0035 |
| -14.6928 | 0.0805 | 0.0036 |
| -14.3730 | 0.0839 | 0.0036 |
| -14.0567 | 0.0915 | 0.0038 |
| -13.7440 | 0.1086 | 0.0040 |
| -13.4346 | 0.1312 | 0.0044 |
| -13.1286 | 0.1445 | 0.0045 |
| -12.8260 | 0.1472 | 0.0046 |
| -12.5266 | 0.1413 | 0.0046 |
| -12.2304 | 0.1336 | 0.0045 |
| -11.9375 | 0.1234 | 0.0044 |
| -11.6477 | 0.0996 | 0.0042 |
| -11.3609 | 0.0796 | 0.0039 |
| -11.0773 | 0.0802 | 0.0040 |
| -10.7966 | 0.0879 | 0.0041 |
| -10.5189 | 0.1015 | 0.0043 |
| -10.2441 | 0.1050 | 0.0044 |
| -9.9722  | 0.0883 | 0.0042 |
| -9.7031  | 0.0771 | 0.0041 |
| -9.4369  | 0.0809 | 0.0042 |
| -9.1734  | 0.0847 | 0.0043 |
| -8.9126  | 0.1039 | 0.0046 |
| -8.6546  | 0.1476 | 0.0052 |
| -8.3991  | 0.2228 | 0.0061 |
| -8.1463  | 0.3344 | 0.0072 |
| -7.8961  | 0.4827 | 0.0085 |
| -7.6484  | 0.6204 | 0.0096 |
| -7.4032  | 0.7076 | 0.0102 |
| -7.1605  | 0.6922 | 0.0102 |
| -6.9203  | 0.5466 | 0.0092 |
| -6.6824  | 0.3760 | 0.0079 |
| -6.4469  | 0.2602 | 0.0069 |
| -6.2138  | 0.1862 | 0.0061 |
| -5.9830  | 0.1603 | 0.0059 |
| -5.7545  | 0.1527 | 0.0058 |
| -5.5282  | 0.1421 | 0.0057 |
| -5.3042  | 0.1394 | 0.0057 |
| -5.0824  | 0.1265 | 0.0056 |
| -4.8627  | 0.1159 | 0.0055 |

|         |          |        |
|---------|----------|--------|
| -4.6451 | 0.1010   | 0.0053 |
| -4.4297 | 0.0892   | 0.0052 |
| -4.2164 | 0.0948   | 0.0053 |
| -4.0051 | 0.0984   | 0.0054 |
| -3.7959 | 0.0969   | 0.0055 |
| -3.5886 | 0.1071   | 0.0057 |
| -3.3834 | 0.1114   | 0.0058 |
| -3.1800 | 0.1205   | 0.0059 |
| -2.9787 | 0.1294   | 0.0061 |
| -2.7792 | 0.1371   | 0.0063 |
| -2.5816 | 0.1970   | 0.0071 |
| -2.3859 | 0.3440   | 0.0087 |
| -2.1920 | 0.5828   | 0.0110 |
| -1.9999 | 0.8159   | 0.0128 |
| -1.8096 | 0.9227   | 0.0137 |
| -1.6211 | 0.8512   | 0.0132 |
| -1.4343 | 0.6863   | 0.0121 |
| -1.2492 | 0.6498   | 0.0118 |
| -1.0659 | 2.3328   | 0.0196 |
| -0.8842 | 16.4845  | 0.0525 |
| -0.7042 | 77.4532  | 0.1189 |
| -0.5258 | 230.8580 | 0.2108 |
| -0.3491 | 473.0290 | 0.3063 |
| -0.1739 | 713.4420 | 0.3798 |
| -0.0004 | 823.4350 | 0.4106 |
| 0.1716  | 733.1820 | 0.3890 |
| 0.3421  | 498.5640 | 0.3211 |
| 0.5110  | 249.0980 | 0.2264 |
| 0.6784  | 84.6007  | 0.1309 |
| 0.8444  | 17.8329  | 0.0595 |
| 1.0088  | 2.6041   | 0.0236 |
| 1.1718  | 0.8383   | 0.0145 |
| 1.3334  | 0.6749   | 0.0133 |
| 1.4935  | 0.6197   | 0.0129 |
| 1.6523  | 0.5853   | 0.0127 |
| 1.8096  | 0.5289   | 0.0122 |
| 1.9656  | 0.4637   | 0.0117 |
| 2.1202  | 0.4036   | 0.0112 |
| 2.2735  | 0.3410   | 0.0106 |
| 2.4255  | 0.3173   | 0.0103 |
| 2.5761  | 0.3204   | 0.0104 |
| 2.7254  | 0.3153   | 0.0104 |
| 2.8735  | 0.3244   | 0.0106 |
| 3.0203  | 0.3341   | 0.0108 |
| 3.1659  | 0.2753   | 0.0102 |
| 3.3102  | 0.2596   | 0.0100 |

|        |        |        |
|--------|--------|--------|
| 3.4533 | 0.2320 | 0.0098 |
| 3.5952 | 0.2041 | 0.0095 |
| 3.7358 | 0.1993 | 0.0095 |
| 3.8754 | 0.1820 | 0.0093 |
| 4.0137 | 0.1786 | 0.0093 |
| 4.1509 | 0.2262 | 0.0100 |
| 4.2869 | 0.1974 | 0.0097 |
| 4.4218 | 0.1932 | 0.0097 |
| 4.5556 | 0.1924 | 0.0098 |
| 4.6883 | 0.2232 | 0.0103 |
| 4.8199 | 0.2899 | 0.0113 |
| 4.9504 | 0.2660 | 0.0110 |
| 5.0798 | 0.2732 | 0.0112 |
| 5.2082 | 0.2766 | 0.0113 |
| 5.3355 | 0.2861 | 0.0115 |
| 5.4618 | 0.3027 | 0.0118 |
| 5.5871 | 0.3170 | 0.0121 |
| 5.7114 | 0.3522 | 0.0126 |
| 5.8346 | 0.3755 | 0.0130 |
| 5.9569 | 0.3786 | 0.0131 |
| 6.0782 | 0.3836 | 0.0132 |
| 6.1985 | 0.3861 | 0.0134 |
| 6.3179 | 0.3922 | 0.0135 |
| 6.4363 | 0.4474 | 0.0142 |
| 6.5537 | 0.5948 | 0.0159 |
| 6.6703 | 0.8015 | 0.0181 |
| 6.7859 | 1.0633 | 0.0205 |
| 6.9006 | 1.3467 | 0.0228 |
| 7.0144 | 1.6621 | 0.0252 |
| 7.1273 | 1.9869 | 0.0274 |
| 7.2393 | 2.1919 | 0.0289 |
| 7.3505 | 2.2825 | 0.0296 |
| 7.4608 | 2.2854 | 0.0297 |
| 7.5702 | 2.1420 | 0.0290 |
| 7.6788 | 1.8861 | 0.0275 |
| 7.7866 | 1.6308 | 0.0259 |
| 7.8935 | 1.3672 | 0.0241 |
| 7.9996 | 1.1572 | 0.0225 |
| 8.1049 | 0.9228 | 0.0206 |
| 8.2094 | 0.7348 | 0.0189 |
| 8.3131 | 0.6121 | 0.0177 |
| 8.4160 | 0.5052 | 0.0166 |
| 8.5181 | 0.4782 | 0.0164 |
| 8.6195 | 0.4147 | 0.0157 |
| 8.7201 | 0.3771 | 0.0154 |
| 8.8199 | 0.3675 | 0.0153 |

|         |        |        |
|---------|--------|--------|
| 8.9190  | 0.2961 | 0.0145 |
| 9.0174  | 0.2660 | 0.0141 |
| 9.1150  | 0.2482 | 0.0140 |
| 9.2118  | 0.2142 | 0.0136 |
| 9.3081  | 0.1935 | 0.0133 |
| 9.4035  | 0.1927 | 0.0134 |
| 9.4982  | 0.1939 | 0.0135 |
| 9.5923  | 0.1879 | 0.0135 |
| 9.6856  | 0.1705 | 0.0133 |
| 9.7783  | 0.2035 | 0.0140 |
| 9.8703  | 0.2107 | 0.0142 |
| 9.9616  | 0.2373 | 0.0147 |
| 10.0523 | 0.3549 | 0.0165 |
| 10.1423 | 0.3605 | 0.0166 |
| 10.2317 | 0.4071 | 0.0174 |
| 10.3203 | 0.4593 | 0.0182 |
| 10.4084 | 0.4756 | 0.0185 |
| 10.4958 | 0.4601 | 0.0184 |
| 10.5826 | 0.4238 | 0.0181 |
| 10.6688 | 0.3569 | 0.0173 |
| 10.7544 | 0.3185 | 0.0169 |
| 10.8393 | 0.2933 | 0.0166 |
| 10.9237 | 0.2472 | 0.0159 |
| 11.0074 | 0.2063 | 0.0154 |
| 11.0906 | 0.2667 | 0.0165 |
| 11.1732 | 0.2063 | 0.0156 |
| 11.2552 | 0.2409 | 0.0163 |
| 11.3366 | 0.2722 | 0.0169 |
| 11.4174 | 0.2592 | 0.0168 |
| 11.4977 | 0.2778 | 0.0172 |
| 11.5774 | 0.3175 | 0.0179 |
| 11.6566 | 0.3745 | 0.0188 |
| 11.7352 | 0.4382 | 0.0199 |
| 11.8133 | 0.5423 | 0.0214 |
| 11.8908 | 0.6129 | 0.0225 |
| 11.9678 | 0.7127 | 0.0238 |
| 12.0443 | 0.7943 | 0.0249 |
| 12.1202 | 0.7928 | 0.0250 |
| 12.1957 | 0.7541 | 0.0247 |
| 12.2705 | 0.7396 | 0.0246 |
| 12.3450 | 0.7195 | 0.0245 |
| 12.4188 | 0.6917 | 0.0243 |
| 12.4922 | 0.6688 | 0.0242 |
| 12.5652 | 0.6454 | 0.0240 |
| 12.6375 | 0.6316 | 0.0240 |
| 12.7094 | 0.6812 | 0.0248 |

|         |        |        |
|---------|--------|--------|
| 12.7808 | 0.7594 | 0.0258 |
| 12.8518 | 0.7609 | 0.0259 |
| 12.9223 | 0.8852 | 0.0276 |
| 12.9922 | 0.9938 | 0.0289 |
| 13.0618 | 0.9672 | 0.0288 |
| 13.1309 | 1.0405 | 0.0298 |
| 13.1995 | 1.0187 | 0.0297 |
| 13.2677 | 1.0096 | 0.0298 |
| 13.3353 | 0.9153 | 0.0289 |
| 13.4026 | 0.9418 | 0.0293 |
| 13.4695 | 0.8994 | 0.0289 |
| 13.5359 | 0.8546 | 0.0286 |
| 13.6018 | 0.8214 | 0.0283 |
| 13.6672 | 0.6484 | 0.0263 |
| 13.7323 | 0.6570 | 0.0266 |
| 13.7970 | 0.6162 | 0.0262 |
| 13.8613 | 0.5987 | 0.0261 |
| 13.9251 | 0.5389 | 0.0253 |
| 13.9885 | 0.4927 | 0.0250 |
| 14.0515 | 0.4578 | 0.0246 |
| 14.1142 | 0.4344 | 0.0244 |
| 14.1764 | 0.4141 | 0.0243 |
| 14.2381 | 0.4825 | 0.0254 |
| 14.2995 | 0.3532 | 0.0236 |
| 14.3606 | 0.3783 | 0.0241 |
| 14.4211 | 0.4108 | 0.0247 |
| 14.4814 | 0.3716 | 0.0242 |
| 14.5412 | 0.4035 | 0.0250 |
| 14.6008 | 0.4104 | 0.0253 |
| 14.6598 | 0.4448 | 0.0260 |
| 14.7186 | 0.4957 | 0.0268 |
| 14.7769 | 0.5298 | 0.0275 |
| 14.8349 | 0.5507 | 0.0280 |
| 14.8926 | 0.6067 | 0.0289 |
| 14.9499 | 0.6059 | 0.0291 |
| 15.0067 | 0.5397 | 0.0283 |
| 15.0633 | 0.5611 | 0.0288 |
| 15.1195 | 0.5787 | 0.0292 |
| 15.1754 | 0.5734 | 0.0292 |
| 15.2309 | 0.5446 | 0.0289 |
| 15.2860 | 0.5735 | 0.0296 |
| 15.3409 | 0.5698 | 0.0297 |
| 15.3954 | 0.5679 | 0.0299 |
| 15.4495 | 0.5754 | 0.0302 |
| 15.5034 | 0.5875 | 0.0305 |
| 15.5569 | 0.5501 | 0.0301 |

|         |        |        |
|---------|--------|--------|
| 15.6100 | 0.5206 | 0.0298 |
| 15.6629 | 0.4718 | 0.0293 |
| 15.7155 | 0.4460 | 0.0290 |
| 15.7676 | 0.4093 | 0.0285 |
| 15.8195 | 0.3609 | 0.0280 |
| 15.8711 | 0.2931 | 0.0270 |
| 15.9224 | 0.2837 | 0.0269 |
| 15.9733 | 0.4151 | 0.0294 |
| 16.0240 | 0.2933 | 0.0275 |
| 16.0744 | 0.2509 | 0.0269 |
| 16.1244 | 0.2556 | 0.0273 |
| 16.1741 | 0.3431 | 0.0288 |
| 16.2236 | 0.3543 | 0.0292 |
| 16.2728 | 0.3302 | 0.0289 |
| 16.3217 | 0.3595 | 0.0296 |
| 16.3702 | 0.2940 | 0.0287 |
| 16.4185 | 0.3188 | 0.0295 |
| 16.4665 | 0.3071 | 0.0294 |
| 16.5143 | 0.2823 | 0.0292 |
| 16.5617 | 0.2614 | 0.0290 |
| 16.6089 | 0.2861 | 0.0296 |
| 16.6558 | 0.2715 | 0.0295 |
| 16.7025 | 0.2434 | 0.0292 |
| 16.7487 | 0.2665 | 0.0298 |
| 16.7948 | 0.3141 | 0.0308 |
| 16.8407 | 0.2801 | 0.0304 |
| 16.8862 | 0.2645 | 0.0303 |
| 16.9315 | 0.2887 | 0.0310 |
| 16.9765 | 0.2074 | 0.0295 |
| 17.0213 | 0.1932 | 0.0296 |
| 17.0658 | 0.3555 | 0.0325 |
| 17.1100 | 0.2261 | 0.0304 |
| 17.1541 | 0.2267 | 0.0306 |
| 17.1978 | 0.2361 | 0.0312 |
| 17.2413 | 0.3841 | 0.0340 |
| 17.2846 | 0.2229 | 0.0310 |
| 17.3275 | 0.2268 | 0.0316 |
| 17.3703 | 0.2007 | 0.0313 |
| 17.4128 | 0.1941 | 0.0314 |
| 17.4551 | 0.1992 | 0.0316 |
| 17.4972 | 0.1907 | 0.0317 |
| 17.5389 | 0.2259 | 0.0326 |
| 17.5805 | 0.2127 | 0.0324 |
| 17.6219 | 0.2193 | 0.0326 |
| 17.6629 | 0.2758 | 0.0341 |
| 17.7038 | 0.2637 | 0.0339 |



|         |        |        |
|---------|--------|--------|
| 17.7445 | 0.2854 | 0.0347 |
| 17.7849 | 0.2471 | 0.0342 |
| 17.8251 | 0.2287 | 0.0341 |
| 17.8650 | 0.2511 | 0.0348 |
| 17.9048 | 0.2275 | 0.0346 |
| 17.9443 | 0.2422 | 0.0351 |
| 17.9836 | 0.4163 | 0.0383 |
| 18.0227 | 0.4303 | 0.0389 |
| 18.0616 | 0.2435 | 0.0357 |
| 18.1003 | 0.4336 | 0.0394 |
| 18.1388 | 0.3011 | 0.0371 |
| 18.1770 | 0.2506 | 0.0365 |
| 18.2150 | 0.2845 | 0.0374 |
| 18.2528 | 0.2698 | 0.0372 |
| 18.2905 | 0.5820 | 0.0428 |
| 18.3279 | 0.2819 | 0.0378 |
| 18.3651 | 0.2258 | 0.0372 |
| 18.4021 | 0.2158 | 0.0372 |
| 18.4390 | 0.2949 | 0.0389 |
| 18.4756 | 0.2819 | 0.0387 |
| 18.5120 | 0.2567 | 0.0387 |
| 18.5482 | 0.2344 | 0.0386 |
| 18.5843 | 0.2385 | 0.0388 |
| 18.6201 | 0.2559 | 0.0394 |
| 18.6557 | 0.3696 | 0.0417 |
| 18.6912 | 0.3755 | 0.0422 |
| 18.7265 | 0.3542 | 0.0419 |
| 18.7615 | 0.4684 | 0.0442 |
| 18.7965 | 0.2875 | 0.0412 |
| 18.8312 | 0.5118 | 0.0452 |
| 18.8658 | 0.3526 | 0.0425 |
| 18.9000 | 0.5276 | 0.0462 |
| 18.9342 | 0.3040 | 0.0423 |
| 18.9682 | 0.3415 | 0.0434 |
| 19.0021 | 0.4229 | 0.0452 |
| 19.0357 | 0.3609 | 0.0444 |
| 19.0691 | 0.4352 | 0.0459 |
| 19.1024 | 0.4259 | 0.0458 |
| 19.1355 | 0.4100 | 0.0459 |
| 19.1685 | 0.4848 | 0.0474 |
| 19.2012 | 0.4916 | 0.0477 |
| 19.2338 | 0.3921 | 0.0464 |
| 19.2662 | 0.3835 | 0.0463 |
| 19.2985 | 0.4721 | 0.0485 |
| 19.3306 | 0.4348 | 0.0477 |
| 19.3625 | 0.4228 | 0.0479 |

|         |         |        |
|---------|---------|--------|
| 19.3943 | 0.4353  | 0.0483 |
| 19.4258 | 0.4383  | 0.0488 |
| 19.4573 | 0.6746  | 0.0527 |
| 19.4886 | 0.4006  | 0.0485 |
| 19.5197 | 0.4205  | 0.0495 |
| 19.5507 | 0.4146  | 0.0494 |
| 19.5815 | 0.4241  | 0.0501 |
| 19.6122 | 0.5253  | 0.0518 |
| 19.6426 | 0.4711  | 0.0510 |
| 19.6730 | 0.3652  | 0.0497 |
| 19.7031 | 0.3816  | 0.0504 |
| 19.7331 | 0.3731  | 0.0505 |
| 19.7631 | 0.4245  | 0.0517 |
| 19.7927 | 0.4847  | 0.0531 |
| 19.8223 | 0.5174  | 0.0539 |
| 19.8518 | 0.4408  | 0.0530 |
| 19.8811 | 0.4644  | 0.0537 |
| 19.9102 | 0.4693  | 0.0541 |
| 19.9392 | 0.5805  | 0.0563 |
| 19.9681 | 0.5206  | 0.0555 |
| 19.9967 | 0.4046  | 0.0537 |
| 20.0254 | 0.3015  | 0.0519 |
| 20.0537 | 0.3118  | 0.0523 |
| 20.0821 | 0.2217  | 0.0509 |
| 20.1102 | 0.4011  | 0.0547 |
| 20.1382 | 0.3110  | 0.0534 |
| 20.1660 | 0.0055  | 0.0469 |
| 20.1938 | -0.1789 | 0.0436 |
| 20.2214 | -0.4251 | 0.0367 |
| 20.2489 | -0.4978 | 0.0377 |
